# Supplementary material
Source: PubMed Central journal article supplement (PMC7034188)
Supplement: DB190281SupplementaryData.pdf [file DB190281SupplementaryData.pdf]

SUPPLEMENTARY DATA

**Supplementary Figure 1. Rodent physiology data**

The (A) body weight, (B) epididymal fat weight, and (C) and fasting blood glucose of LDLR<sup>-/-</sup> mice or mice fed a low fat diet (LFD)-fed or high fat diet (HFD). The (D) plasma cholesterol and (E) triglycerol levels of LDLR<sup>-/-</sup> mice raised on a western diet (WD). (F) Body weight and fed blood glucose levels of ZDF rats, db/db mice and their corresponding controls (SD rat and db/+ mice). All error bars indicate SEM. \*\*P<0.01, \*\*\*P<0.001.

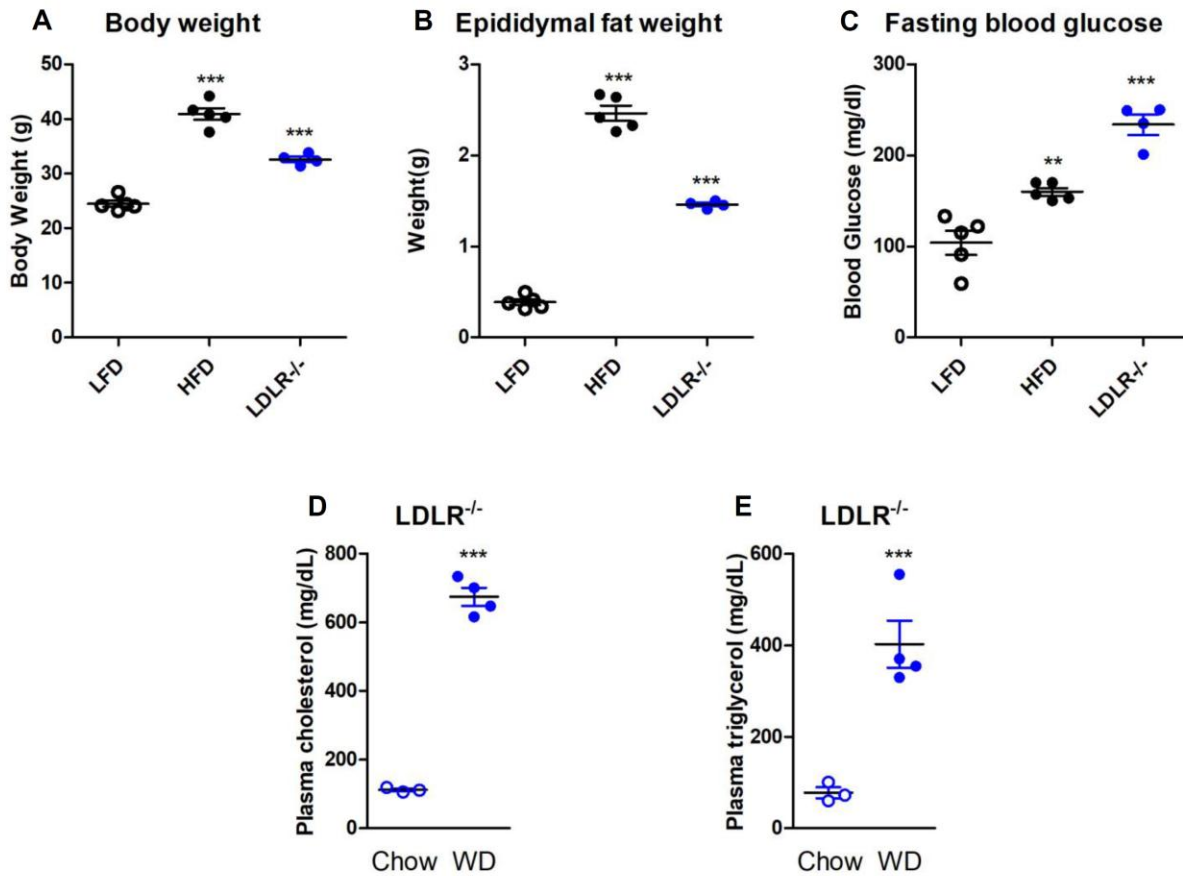

**F**

| Rodent type       | Body weight     | Fed blood glucose    |
|-------------------|-----------------|----------------------|
| SD rat (n=2)      | 275g (average)  | 110mg/dl (Average)   |
| ZDF rat (n=1)     | 360g            | 270mg/dl             |
| db/+ mouse (n=3)  | 30.7g (Average) | 195mg/dl (Average)   |
| db/db mouse (n=3) | 49.5g (Average) | 377.7mg/dl (Average) |

SUPPLEMENTARY DATA

**Supplementary Figure 2. Analysis of the change in human islet LD content in respect to age.**

The human islet LD level from years (A) 0-2, (B) 3-11, (C) 16-20, and (D) 35-55 years. The number of islets counted per donor are in parenthesis. The results were determined from images represented in Figure 2.

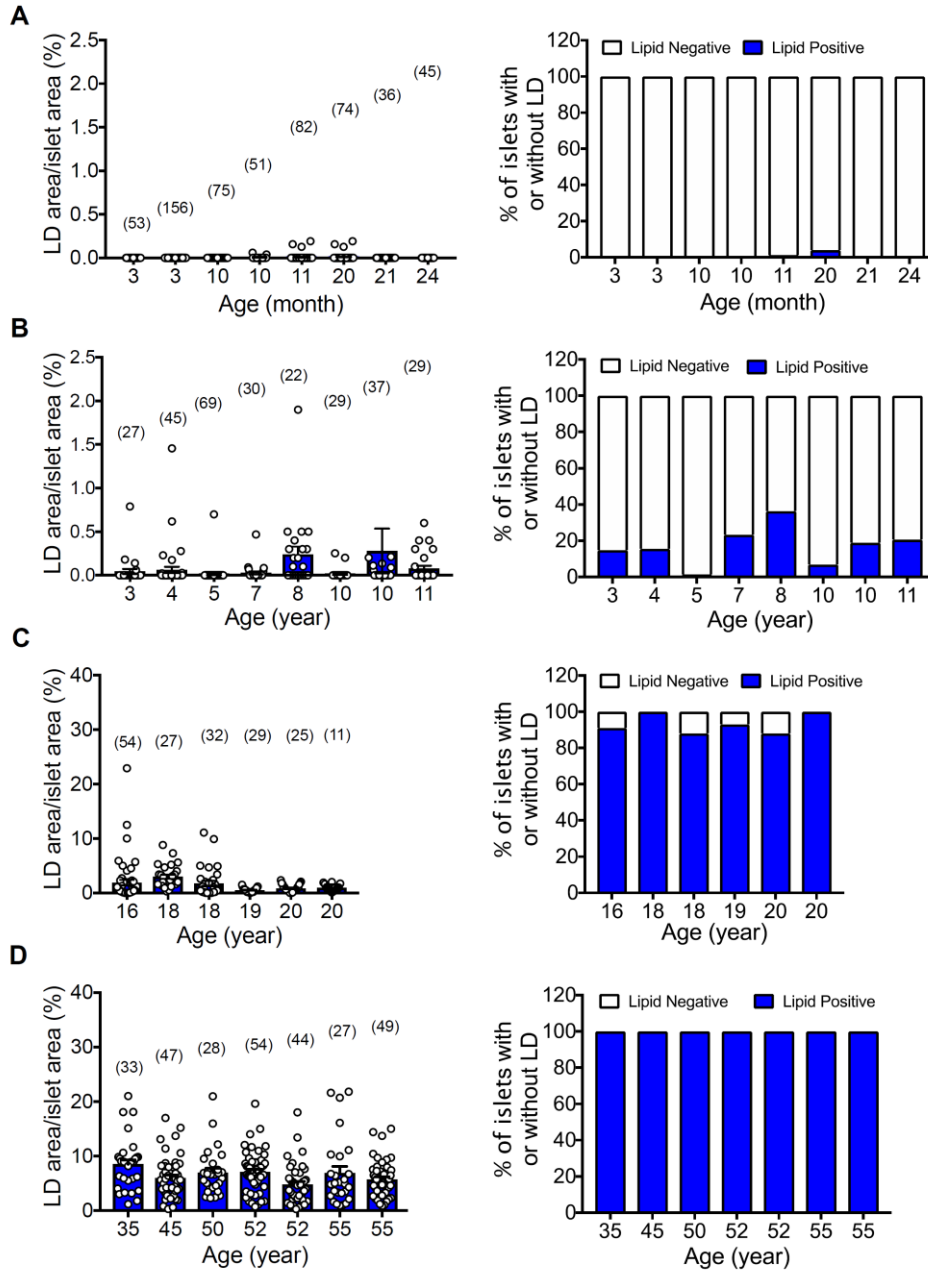

## SUPPLEMENTARY DATA

### **Supplementary Figure 3. The change in LD distribution in pre- and post-transplanted human islets and eBCs.**

(A) Representative BODIPY staining images before and after transplantation of islets from a 47 year-old human islet donor. The asterisk (brown) in the left panel depicts the BODIPY<sup>+</sup> (green) signal in islet cells, with the hormone<sup>+</sup> (red) and BODIPY<sup>+</sup> cell signals shown in the right panel. The graphs illustrate that LDs are found in more islet cells after transplantation. There is also a trend towards increased LD<sup>+</sup> area within the islet after transplantation. Quantitation was performed on 8 islets before transplantation and 6 separate 0.1 mm<sup>2</sup> areas after transplantation. (B) Representative BODIPY<sup>+</sup> and insulin<sup>+</sup> cell images of *in vitro* eBCs and eBC transplants after 9 months in NSG mice. The asterisk depicts the BODIPY<sup>+</sup> (green) cell signal. The graphs show the significantly higher number of LD<sup>+</sup> cells in insulin<sup>+</sup> cells within the 3- and 9-month transplanted eBCs in relation to *in vitro*-derived D20 insulin<sup>+</sup> cells or *in vitro*-derived eBCs. Each dot represents the average reading from an independently derived sample (D20, n=3; eBC, n=5; eBC transplants, n=6). All error bars indicate SEM. \*P<0.05, \*\*P<0.01.

SUPPLEMENTARY DATA

**A** Before transplantation - Adult human islets (47yr)

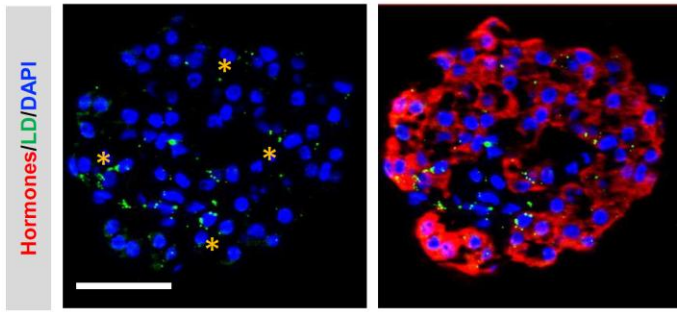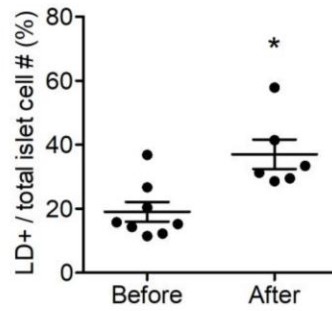

After transplantation

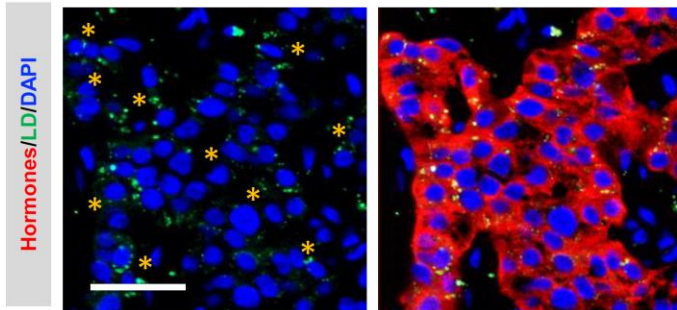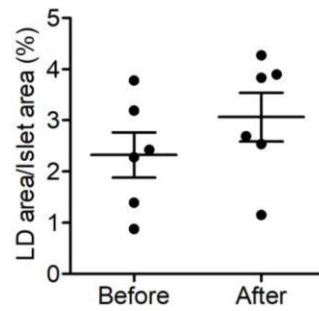

**B** Before transplantation - eBCs (d27)

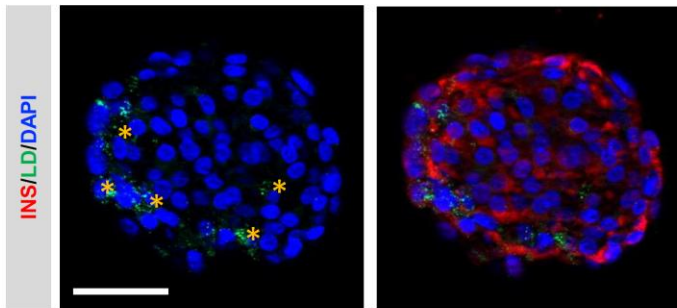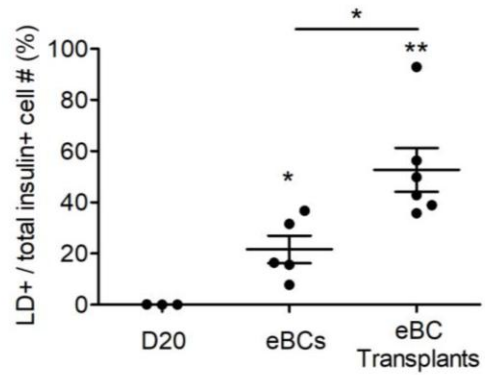

After transplantation - eBCs (9 mon)

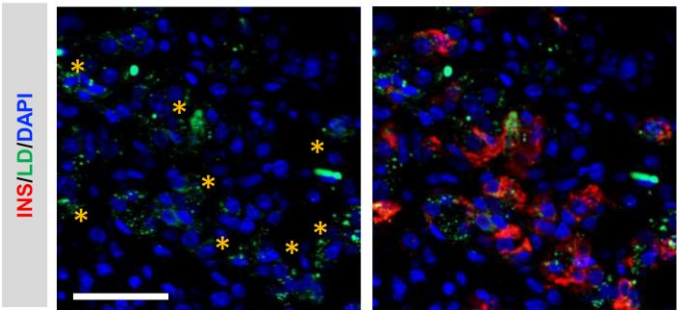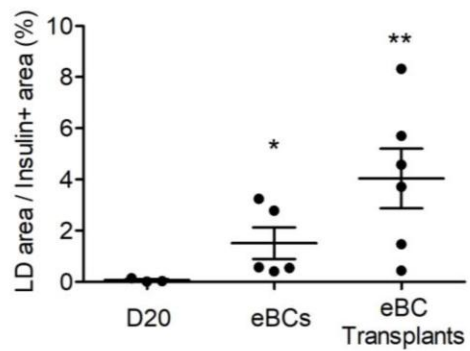

## SUPPLEMENTARY DATA

### Supplementary Figure 4. PLIN2 and PLIN3 have a weak, diffuse protein staining pattern in mouse and juvenile human islets in comparison to adult humans

Pancreatic images from a (A) HFD-fed mouse, (B) 8 year-old human and (C) 35 year-old human analyzed for LD BODIPY (green), insulin (white), PLIN2 (magenta), PLIN3 (red) and nuclei (DAPI, blue). The yellow dotted lines outline the islet insulin<sup>+</sup> (white) area.

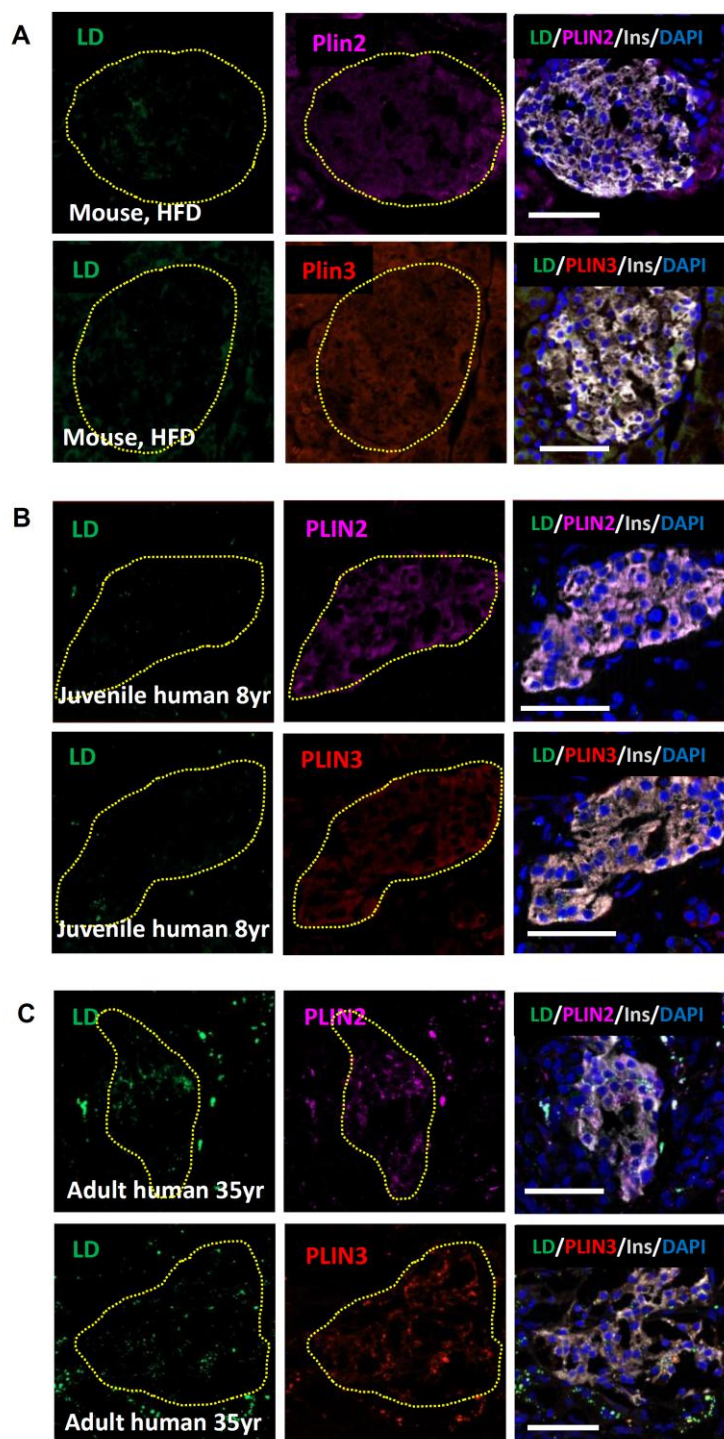



SUPPLEMENTARY DATA

**Supplementary Figure 5. LD and PLIN2/3 levels in the D20 immature islet clusters, eBCs, and NSG transplanted eBCs.**

(A) Representative immunostaining images of BODIPY (green), PLIN2 (magenta), PLIN3 (red) and nuclei (DAPI, blue) in D20, D27 eBC and a 9-month (m) eBC transplant. Scale bar = 50  $\mu$ m. (B) Summary of the BODIPY, PLIN2 and PLIN3 levels data collected on the D20, eBCs and eBC transplant samples by staining. -, very low level to undetectable; +, low level, ++, intermediate level; +++, high level.

**A**

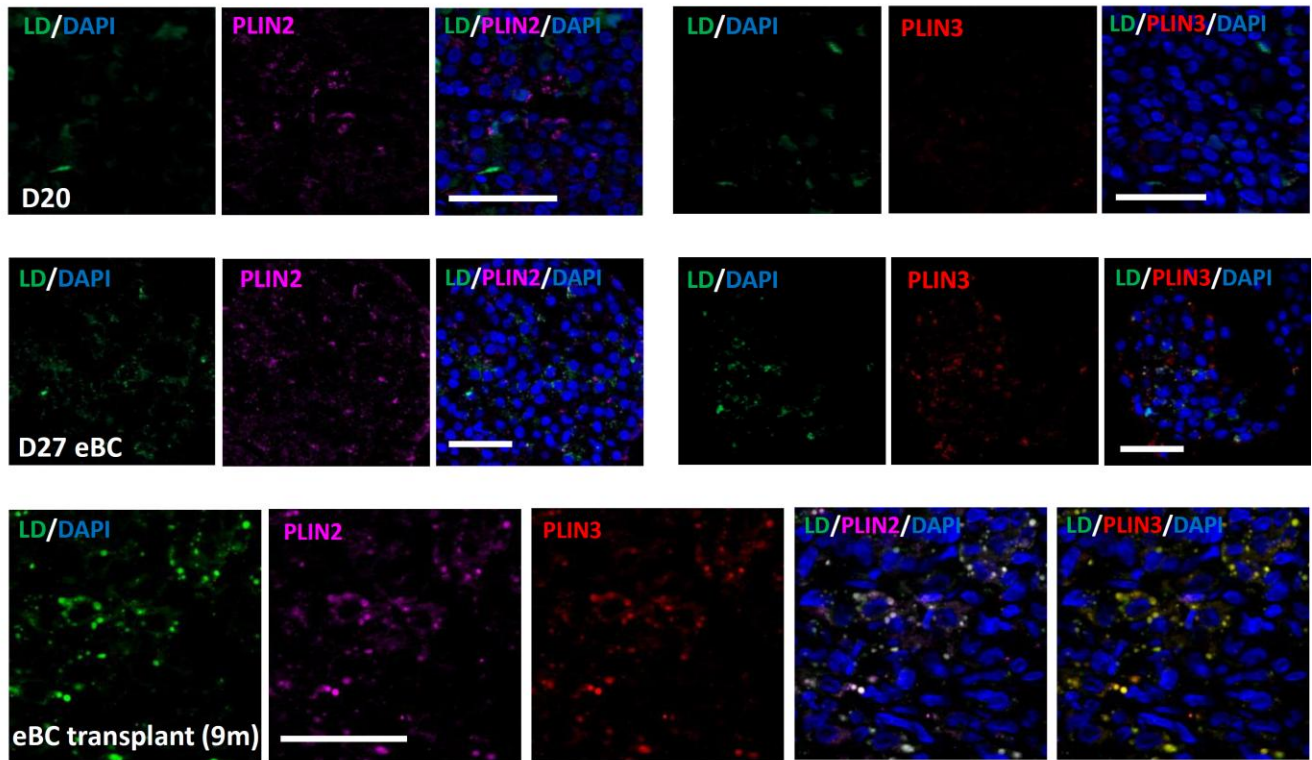

**B**

| Time line           | Bodipy level | PLIN2 level | PLIN3 level |
|---------------------|--------------|-------------|-------------|
| In vitro-D20        | -            | +           | -           |
| In vitro-D24 (eBCs) | +            | +           | +           |
| In vitro-D27 (eBCs) | +            | +           | +           |
| In vitro-D28 (eBCs) | ++           | +           | +           |
| In vivo-3m post Tx  | ++           | ++          | ++          |
| In vivo-9m post Tx  | +++          | ++          | ++          |

SUPPLEMENTARY DATA

Supplementary Table 1. Detailed human donor information and LD levels (adult > 26Y)

| Disease condition   | Age  | Gender | BMI  | Assay used        | Used in figure                       | Islet LD% | Acinar LD% | HbA1C |
|---------------------|------|--------|------|-------------------|--------------------------------------|-----------|------------|-------|
| Healthy             | 35yr | M      | 26.8 | LD quantification | 2B-C, 5, 7B-E<br>Supplemental 2D, 5C | 8.5       | 6.0        | NA    |
| Healthy             | 45yr | F      | 29.7 | LD quantification | 2B-C, 7B-E,<br>Supplemental 2D       | 5.9       | 7.3        | NA    |
| Healthy             | 50yr | M      | NA   | LD quantification | 2A-C, 7B-E,<br>Supplemental 2D       | 7.0       | 5.5        | NA    |
| Healthy             | 52yr | M      | 29.2 | LD quantification | 2B-C, 7B-E,<br>Supplemental 2D       | 5.7       | 2.6        | NA    |
| Healthy             | 52yr | M      | 28   | LD quantification | 2B-C, 7B-E,<br>Supplemental 2D       | 4.8       | 1.4        | NA    |
| Healthy             | 55yr | M      | 35.6 | LD quantification | 2B-C, 7B-E,<br>Supplemental 2D       | 7.1       | 3.2        | NA    |
| Healthy             | 55yr | F      | 24.2 | LD quantification | 1D, 2B-C, 7A-E,<br>Supplemental 2D   | 7.6       | 6.2        | NA    |
| Newly diagnosed T2D | 40yr | F      | 43.1 | LD quantification | 7B-E                                 | 10.5      | 0.9        | 8.2%  |
| Newly diagnosed T2D | 42yr | M      | 42   | LD quantification | 7B-E                                 | 5.7       | 1.1        | 8.1%  |
| T2D for 5Y          | 37yr | M      | 49.8 | LD quantification | 7B-E                                 | 2.6       | 0.6        | 6.9%  |
| T2D for 1Y          | 43yr | M      | 36.1 | LD quantification | 7B-E                                 | 8.6       | 3.1        | 7.0%  |
| T2D for 3Y          | 47yr | M      | 31.3 | LD quantification | 7B-E                                 | 3.5       | 0.2        | NA    |
| T2D for 3Y          | 49yr | F      | 33.8 | LD quantification | 7B-E                                 | 6.2       | 0.9        | 8.3%  |
| T2D for 4Y          | 50yr | M      | 32.9 | LD quantification | 7A-E                                 | 3.9       | 0.9        | 11.2% |
| T2D for 10Y         | 59yr | F      | 27.5 | LD quantification | 7B-E                                 | 17.0      | 6.7        | 6.2%  |
| T2D for 1Y          | 60yr | M      | 38.3 | LD quantification | 7B-E                                 | 13.0      | 1.7        | 7.2%  |
| T2D for 5Y          | 64yr | M      | 33.2 | LD quantification | 7B-F                                 | 8.4       | 2.3        | NA    |
| T2D for 3Y          | 66yr | F      | 33   | LD quantification | 7B-E                                 | 5.5       | 0.8        | NA    |
| Healthy             | 67yr | F      | NA   | EM                | 1A-C                                 | NA        | NA         | NA    |

SUPPLEMENTARY DATA

Supplementary Table 2. LD analysis - Healthy human donor information (3 m – 20 years)

| Age  | Gender | BMI  | Assay used            | Used in figure                  |
|------|--------|------|-----------------------|---------------------------------|
| 3m   | M      | 16.8 | LD quantification     | 2B-C, Supplemental 2A           |
| 3m   | M      | 17   | LD quantification     | 2B-C, Supplemental 2A           |
| 10m  | F      | 15.4 | LD quantification     | 2B-C, Supplemental 2A           |
| 10m  | F      | 23.1 | LD quantification     | 2B-C, Supplemental 2A           |
| 11m  | M      | 18.4 | LD quantification     | 2A-C, Supplemental 2A           |
| 20m  | F      | 23.4 | LD quantification     | 2B-C, Supplemental 2A           |
| 21m  | M      | 18.8 | LD quantification     | 2B-C, Supplemental 2A           |
| 24m  | F      | 17.4 | LD quantification, EM | 1A-C, 2B-C, Supplemental 2A     |
| 3yr  | F      | 12.9 | LD quantification, EM | 1B-C, 2B-C, Supplemental 2B     |
| 4yr  | M      | 19.6 | LD quantification, EM | 1B-C, 2B-C, Supplemental 2B     |
| 5yr  | M      | 17.8 | LD quantification     | 2B-C, Supplemental 2B           |
| 7yr  | M      | 26.7 | LD quantification     | 2A-C, Supplemental 2B           |
| 8yr  | F      | 16.1 | LD quantification, EM | 1A-C, 2B-C, Supplemental 2B, 5B |
| 10yr | M      | 19.9 | LD quantification     | 2B-C, Supplemental 2B           |
| 10yr | F      | 18.6 | LD quantification, EM | 1A-C, 2B-C, Supplemental 2B     |
| 11yr | M      | 18.3 | LD quantification     | 1B-C, 2B-C, Supplemental 2B     |
| 16yr | M      | 23.2 | LD quantification     | 2B-C, Supplemental 2C           |
| 18yr | M      | 31.4 | LD quantification     | 2B-C, Supplemental 2C           |
| 18yr | M      | 25.1 | LD quantification     | 2B-C, Supplemental 2C           |
| 19yr | M      | 21.2 | LD quantification, EM | 1A-C, 2A-C, Supplemental 2C     |
| 20yr | M      | 27.8 | LD quantification     | 2B-C, Supplemental 2C           |



SUPPLEMENTARY DATA

Supplementary Table 3. qPCR analysis - human donor information

| Disease condition | Age  | Gender | BMI  | Assay used  |
|-------------------|------|--------|------|-------------|
| Healthy           | 14m  | F      | NA   | 6A, D       |
| Healthy           | 20m  | M      | NA   | 6A, D       |
| Healthy           | 3yr  | NA     | NA   | 6A, D       |
| Healthy           | 4yr  | F      | NA   | 6A, D       |
| Healthy           | 5yr  | M      | NA   | 6A, D       |
| Healthy           | 9yr  | NA     | NA   | 6A, D       |
| Healthy           | 35yr | M      | 28.5 | 6B, D, G    |
| Healthy           | 37yr | M      | 27.6 | 6B, D, G    |
| Healthy           | 39yr | M      | 26.5 | 6B, D, G    |
| Healthy           | 43yr | M      | 24   | 6B, D, F, G |
| Healthy           | 44yr | F      | 23.8 | 6B, D, F, G |
| Healthy           | 48yr | F      | 29.2 | 6B, D, F, G |
| Healthy           | 53yr | F      | 28.8 | 6B, D, F, G |
| Healthy           | 59yr | F      | 22   | 6B, D, F, G |
| Healthy           | 68yr | M      | 24.9 | 6B, D, F, G |
| T2D               | 47yr | M      | 31.3 | 6E, F       |
| T2D               | 49yr | F      | 33.8 | 6E, F       |
| T2D               | 51yr | F      | 31.1 | 6E, F       |
| T2D               | 59yr | M      | NA   | 6E, F       |
| T2D               | 60yr | F      | 38.3 | 6E, F       |
| T2D               | 61yr | M      | 42.1 | 6E, F       |

SUPPLEMENTARY DATA

Supplementary Table 4. Transplants LD analysis - human donor information

| Disease condition | Age  | Gender | BMI  | Assay used      | Used in figure |
|-------------------|------|--------|------|-----------------|----------------|
| Healthy           | 2mo  | NA     | NA   | Transplantation | 3B-C           |
| Healthy           | 10mo | NA     | NA   | Transplantation | 3B-C           |
| Healthy           | 6yr  | NA     | NA   | Transplantation | 3B-C           |
| Healthy           | 11yr | M      | 17.8 | Transplantation | 3B-C           |
| Healthy           | 37yr | M      | NA   | Transplantation | 3B-C           |
| Healthy           | 43yr | M      | 29.6 | Transplantation | 3B-C           |
| Healthy           | 45yr | M      | 29.3 | Transplantation | 3B-C           |
| Healthy           | 48yr | F      | 29.2 | Transplantation | 3B-C           |
| Healthy           | 47yr | M      | 36.1 | Transplantation | Supplemental 3 |

## Checklist for Reporting Human Islet Preparations Used in Research

Adapted from Hart NJ, Powers AC (2018) Progress, challenges, and suggestions for using human islets to understand islet biology and human diabetes. *Diabetologia* <https://doi.org/10.1007/s00125-018-4772-2>.

|                                                                                                                                                              |                                                   |
|--------------------------------------------------------------------------------------------------------------------------------------------------------------|---------------------------------------------------|
| <b>Manuscript DOI:</b> <a href="https://doi.org/10.2337/DB19-0281.R1">https://doi.org/10.2337/DB19-0281.R1</a>                                               |                                                   |
| <b>Title:</b> Lipid droplet accumulation in human pancreatic islets is dependent upon both donor age and health                                              |                                                   |
| <b>Author list:</b> Xin Tong, Chunhua Dai, John T. Walker, Gopika G. Nair, Arion Kennedy, Rotonya M. Carr, Matthias Hebrok, Alvin C. Powers and Roland Stein |                                                   |
| <b>Corresponding author:</b> Roland Stein                                                                                                                    | <b>Email address:</b> roland.stein@vanderbilt.edu |

### Juvenile

| Islet preparation              | 1         | 2         | 3   | 4   | 5   | 6   | 7       | 8   | 9   | 10      |
|--------------------------------|-----------|-----------|-----|-----|-----|-----|---------|-----|-----|---------|
| <b>MANDATORY INFORMATION</b>   |           |           |     |     |     |     |         |     |     |         |
| Unique identifier              | N/A       | N/A       | N/A | N/A | N/A | N/A | ACKE380 | N/A | N/A | ADEY348 |
| Donor age (years)              | 1.2 (14m) | 1.7 (20m) | 3   | 4   | 5   | 9   | 2m      | 10m | 6   | 11      |
| Donor sex (M/F)                | F         | M         | N/A | F   | M   | N/A | N/A     | N/A | N/A | M       |
| Donor BMI (kg/m <sup>2</sup> ) | N/A       | N/A       | N/A | N/A | N/A | N/A | N/A     | N/A | N/A | 17.8    |

SUPPLEMENTARY DATA

|                                                                   |             |     |             |             |     |     |     |     |     |     |
|-------------------------------------------------------------------|-------------|-----|-------------|-------------|-----|-----|-----|-----|-----|-----|
| Donor HbA <sub>1c</sub> or other measure of blood glucose control | N/A         | N/A | N/A         | N/A         | N/A | N/A | N/A | N/A | N/A | N/A |
| Origin/source of islets <sup>b</sup>                              | IIDP        | AHN | IIDP        | IIDP        | AHN | AHN | AHN | AHN | AHN | AHN |
| Islet isolation centre                                            | U Wisconsin | AHN | U Wisconsin | U Wisconsin | AHN | AHN | AHN | AHN | AHN | AHN |
| Donor history of diabetes? Yes/No                                 | No          | No  | No          | No          | No  | No  | No  | No  | No  | No  |

| RECOMMENDED INFORMATION                                                           |             |             |             |             |             |                |     |     |     |     |
|-----------------------------------------------------------------------------------|-------------|-------------|-------------|-------------|-------------|----------------|-----|-----|-----|-----|
| Donor cause of death                                                              | N/A         | N/A         | N/A         | N/A         | N/A         | CVA/<br>stroke | N/A | N/A | N/A | N/A |
| Warm ischaemia time (h)                                                           | N/A         | N/A         | N/A         | N/A         | N/A         | 11             | N/A | N/A | N/A | N/A |
| Cold ischaemia time (h)                                                           | N/A         | N/A         | N/A         | 18          | N/A         | 11             | N/A | N/A | N/A | N/A |
| Estimated purity (%)                                                              | 85          | N/A         | N/A         | 87          | N/A         | 65             | N/A | N/A | N/A | N/A |
| Estimated viability (%)                                                           | N/A         | N/A         | N/A         | N/A         | N/A         | N/A            | N/A | N/A | N/A | N/A |
| Total culture time (h) <sup>d</sup>                                               | 24          | N/A         | <24         | N/A         | <24         | 36             | N/A | N/A | N/A | N/A |
| Glucose-stimulated insulin secretion or other functional measurement <sup>e</sup> | Perifusion* | Perifusion* | Perifusion* | Perifusion* | Perifusion* | Perifusion*    | yes | No  | yes | No  |
| Handpicked to purity? Yes/No                                                      | yes         | yes         | yes         | yes         | yes         | yes            | No  | No  | No  | No  |

SUPPLEMENTARY DATA

|                  |  |  |  |  |  |  |  |  |  |  |
|------------------|--|--|--|--|--|--|--|--|--|--|
| Additional notes |  |  |  |  |  |  |  |  |  |  |
|------------------|--|--|--|--|--|--|--|--|--|--|

Healthy adults-1

| Islet preparation                                                 | 11      | 12           | 13           | 14      | 15      | 16           | 17      | 18           | 19          | 20               |
|-------------------------------------------------------------------|---------|--------------|--------------|---------|---------|--------------|---------|--------------|-------------|------------------|
| <b>MANDATORY INFORMATION</b>                                      |         |              |              |         |         |              |         |              |             |                  |
| Unique identifier                                                 | ADBC220 | ADIP333      | CCM433A      | AAKS193 | ACCZ042 | AAK4206      | ABAI077 | AEAT060      | ADCK302     | SAMN117<br>91244 |
| Donor age (years)                                                 | 35      | 37           | 39           | 43      | 44      | 48           | 53      | 59           | 68          | 47               |
| Donor sex (M/F)                                                   | M       | M            | M            | M       | F       | F            | F       | F            | M           | M                |
| Donor BMI (kg/m <sup>2</sup> )                                    | 28.5    | 27.6         | 26.5         | 24      | 23.8    | 29.2         | 25.4    | 22           | 24.9        | 36.1             |
| Donor HbA <sub>1c</sub> or other measure of blood glucose control | 5.3     | N/A          | N/A          | N/A     | N/A     | 6.4          | N/A     | 5.2          | 4.8         | 5.7              |
| Origin/source of islets <sup>b</sup>                              | IIDP    | IIDP         | IIDP         | IIDP    | IIDP    | IIDP         | IIDP    | IIDP         | IIDP        | IIDP             |
| Islet isolation centre                                            | U Penn  | U. Wisconsin | S California | U Miami | U Penn  | U. Wisconsin | U Penn  | U. Wisconsin | U. Illinois | S California     |
| Donor history of diabetes? Yes/No                                 | No      | No           | No           | No      | No      | No           | No      | No           | No          | No               |
| <b>RECOMMENDED INFORMATION</b>                                    |         |              |              |         |         |              |         |              |             |                  |



## SUPPLEMENTARY DATA

| Donor cause of death                                                              | Head trauma | CVA/stroke  | CVA/stroke  | CVA/stroke  | CVA/stroke  | CVA/stroke  | N/A         | CVA/stroke  | Head trauma | CVA         |
|-----------------------------------------------------------------------------------|-------------|-------------|-------------|-------------|-------------|-------------|-------------|-------------|-------------|-------------|
| Warm ischaemia time (h)                                                           | N/A         | 0.3         |
| Cold ischaemia time (h)                                                           | 6.5         | 11.25       | N/A         | 12.6        | 6.2         | 4           | 6.5         | 6.5         | 7           | 6.4         |
| Estimated purity (%)                                                              | 95          | 90          | 83          | 90          | 95          | 85          | 97          | 95          | 95          | 95          |
| Estimated viability (%)                                                           | 95          | 95          | 97          | 90          | 95          | 94          | 97          | 96          | 98          | 96          |
| Total culture time (h) <sup>d</sup>                                               | 65          | 48          | 48          | 66          | 46          | 16          | 19          | 36          | 48          | 29          |
| Glucose-stimulated insulin secretion or other functional measurement <sup>e</sup> | Perifusion* |
| Handpicked to purity? Yes/No                                                      | yes         | No          |
| Additional notes                                                                  |             |             |             |             |             |             |             |             |             |             |

## Healthy adults-2

| Islet preparation            | 21 | 22 | 23 | 24 |
|------------------------------|----|----|----|----|
| <b>MANDATORY INFORMATION</b> |    |    |    |    |

SUPPLEMENTARY DATA

|                                                                   |              |             |              |              |
|-------------------------------------------------------------------|--------------|-------------|--------------|--------------|
| Unique identifier                                                 | ADIP333      | AADP290     | AFEA331      | AAK4206      |
| Donor age (years)                                                 | 37           | 43          | 45           | 48           |
| Donor sex (M/F)                                                   | M            | M           | M            | F            |
| Donor BMI (kg/m <sup>2</sup> )                                    | N/A          | 29.6        | 29.3         | 29.2         |
| Donor HbA <sub>1c</sub> or other measure of blood glucose control | N/A          | N/A         | N/A          | 6.4          |
| Origin/source of islets <sup>b</sup>                              | IIDP         | IIDP        | IIDP         | IIDP         |
| Islet isolation centre                                            | U. Wisconsin | U Penn      | S California | U. Wisconsin |
| Donor history of diabetes? Yes/No                                 | No           | No          | No           | No           |
| <b>RECOMMENDED INFORMATION</b>                                    |              |             |              |              |
| Donor cause of death                                              | N/A          | Head trauma | N/A          | CVA          |
| Warm ischaemia time (h)                                           | N/A          | N/A         | N/A          | N/A          |
| Cold ischaemia time (h)                                           | N/A          | 5.8         | N/A          | 4            |
| Estimated purity (%)                                              | N/A          | 90          | 95           | 90           |
| Estimated viability (%)                                           | N/A          | 91          | 95           | 95           |

SUPPLEMENTARY DATA

|                                                                                   |     |     |     |     |
|-----------------------------------------------------------------------------------|-----|-----|-----|-----|
| Total culture time (h) <sup>d</sup>                                               | N/A | 16  | N/A | 16  |
| Glucose-stimulated insulin secretion or other functional measurement <sup>e</sup> | yes | yes | yes | yes |
| Handpicked to purity? Yes/No                                                      | No  | No  | No  | No  |
| Additional notes                                                                  |     |     |     |     |

T2D adults

| Islet preparation                                                 | 25      | 26      | 27      | 28      | 29      | 30      |
|-------------------------------------------------------------------|---------|---------|---------|---------|---------|---------|
| <b>MANDATORY INFORMATION</b>                                      |         |         |         |         |         |         |
| Unique identifier                                                 | ABIC495 | ABHQ115 | ADDA138 | ADBI307 | ADLE098 | ABDG032 |
| Donor age (years)                                                 | 47      | 49      | 51      | 59      | 60      | 61      |
| Donor sex (M/F)                                                   | M       | F       | M       | M       | M       | M       |
| Donor BMI (kg/m <sup>2</sup> )                                    | 31.3    | 33.8    | 31.1    | N/A     | 38.3    | 42.1    |
| Donor HbA <sub>1c</sub> or other measure of blood glucose control | N/A     | N/A     | N/A     | N/A     | 7.2     | N/A     |

SUPPLEMENTARY DATA

|                                                                                   |             |             |             |             |             |             |
|-----------------------------------------------------------------------------------|-------------|-------------|-------------|-------------|-------------|-------------|
| Origin/source of islets <sup>b</sup>                                              | AHN         | AHN         | AHN         | AHN         | AHN         | IIDP        |
| Islet isolation centre                                                            | AHN         | AHN         | AHN         | AHN         | AHN         | Sharp/Lacy  |
| Donor history of diabetes? Yes/No                                                 | Yes         | Yes         | Yes         | Yes         | Yes         | Yes         |
| <b>If Yes, complete the next two lines if this information is available</b>       |             |             |             |             |             |             |
| Diabetes duration (years)                                                         | 3           | 3           | 3           | 10          | 0-5         | 8           |
| Glucose-lowering therapy at time of death <sup>c</sup>                            | N/A         | N/A         | N/A         | N/A         | N/A         | N/A         |
| <b>RECOMMENDED INFORMATION</b>                                                    |             |             |             |             |             |             |
| Donor cause of death                                                              | CVA/stroke  | CVA/stroke  | CVA/stroke  | CVA/stroke  | Head trauma | Head trauma |
| Warm ischaemia time (h)                                                           | N/A         | N/A         | N/A         | N/A         | N/A         | N/A         |
| Cold ischaemia time (h)                                                           | N/A         | N/A         | N/A         | 15.6        | 14          | 12.9        |
| Estimated purity (%)                                                              | 80          | 60          | 55          | 70          | 70          | 75          |
| Estimated viability (%)                                                           | 95          | N/A         | N/A         | 85          | 90          | 90          |
| Total culture time (h) <sup>d</sup>                                               | 27          | <24         | 22          | 36          | 21          | <24         |
| Glucose-stimulated insulin secretion or other functional measurement <sup>e</sup> | Perifusion* | Perifusion* | Perifusion* | Perifusion* | Perifusion* | Perifusion* |

## SUPPLEMENTARY DATA

|                                 |     |     |     |     |     |     |
|---------------------------------|-----|-----|-----|-----|-----|-----|
| Handpicked to purity?<br>Yes/No | yes | yes | yes | yes | yes | yes |
| Additional notes                |     |     |     |     |     |     |

\*Perfusion was performed to determine basic islet secretory function. All healthy donor islets showed good response indicating high quality isolation and sample preparation; Islets from T2D donors showed different degrees of abnormality. Detailed information is available upon reasonable request.

<sup>a</sup>If you have used more than eight islet preparations, please complete additional forms as necessary

<sup>b</sup>For example, IIDP, ECIT, Alberta IsletCore

<sup>c</sup>Please specify the therapy/therapies

<sup>d</sup>Time of islet culture at the isolation centre, during shipment and at the receiving laboratory

<sup>e</sup>Please specify the test and the results
